## HUMAN VISUAL CORTEX AND DEEP CONVOLUTIONAL NEURAL NETWORKS CARE DEEPLY ABOUT OBJECT BACKGROUND

1 **Title:**

2 Human visual cortex and deep convolutional neural network care deeply about object  
3 background

4

5 **Short title:** Human visual cortex and DCNNs care about object background

6

7 **Authors and affiliations:**

8 Jessica Loke<sup>1,2¶\*</sup>, Noor Seijdel<sup>1,2¶</sup>, Lukas Snoek<sup>1,2</sup>, Lynn K. A. Sørensen<sup>1,2</sup>, Ron van de  
9 Klundert<sup>1</sup>, Matthew van der Meer<sup>1</sup>, Eva Quispel<sup>1</sup>, Natalie Cappaert<sup>3</sup>, H. Steven  
10 Scholte<sup>1,2</sup>

11 <sup>1</sup> Department of Psychology, University of Amsterdam, Amsterdam, The  
12 Netherlands

13 <sup>2</sup> Amsterdam Brain & Cognition (ABC) Center, University of Amsterdam, Amsterdam,  
14 The Netherlands

15 <sup>3</sup> Swammerdam Institute for Life Sciences, University of Amsterdam, The  
16 Netherlands

17 \* Corresponding author

18 E-mail: [jessloke08@gmail.com](mailto:jessloke08@gmail.com) (JL)

19 ¶ These authors contributed equally / shared first author

20 \* These authors also contributed equally to this work

21

22 **Number of pages: 32**

23

## HUMAN VISUAL CORTEX AND DEEP CONVOLUTIONAL NEURAL NETWORKS CARE DEEPLY ABOUT OBJECT BACKGROUND

24 **Number of Figures: 7**

25

26 **Conflict of interest:**

27 The authors declare no competing financial interests.

28

29 **Data and code availability:**

30 Data and code to reproduce the analyses in this article will be made available at

31 <https://osf.io/es34u/>

## HUMAN VISUAL CORTEX AND DEEP CONVOLUTIONAL NEURAL NETWORKS CARE DEEPLY ABOUT OBJECT BACKGROUND

### 32 Abstract

33 Deep convolutional neural networks (DCNNs) are able to predict brain activity during object  
34 categorization tasks, but factors contributing to this predictive power are not fully  
35 understood. Our study aimed to investigate the factors contributing to the predictive power  
36 of DCNNs in object categorization tasks. We compared the activity of four DCNN  
37 architectures with electroencephalography (EEG) recordings obtained from 62 human  
38 subjects during an object categorization task. Previous physiological studies on object  
39 categorization have highlighted the importance of figure-ground segregation - the ability to  
40 distinguish objects from their backgrounds. Therefore, we set out to investigate if figure-  
41 ground segregation could explain DCNNs predictive power. Using a stimuli set consisting of  
42 identical target objects embedded in different backgrounds, we examined the influence of  
43 object background versus object category on both EEG and DCNN activity. Crucially, the  
44 recombination of naturalistic objects and experimentally-controlled backgrounds creates a  
45 sufficiently challenging and naturalistic task, while allowing us to retain experimental control.  
46 Our results showed that early EEG activity (<100ms) and early DCNN layers represent object  
47 background rather than object category. We also found that the predictive power of DCNNs  
48 on EEG activity is related to processing of object backgrounds, rather than categories. We  
49 provided evidence from both trained and untrained (i.e. random weights) DCNNs, showing  
50 figure-ground segregation to be a crucial step prior to the learning of object features. These  
51 findings suggest that both human visual cortex and DCNNs rely on the segregation of object  
52 backgrounds and target objects in order to perform object categorization. Altogether, our  
53 study provides new insights into the mechanisms underlying object categorization as we  
54 demonstrated that both human visual cortex and DCNNs care deeply about object  
55 background.

## HUMAN VISUAL CORTEX AND DEEP CONVOLUTIONAL NEURAL NETWORKS CARE DEEPLY ABOUT OBJECT BACKGROUND

### 56 Author summary

57 Our study aimed to investigate the factors contributing to the predictive power of deep  
58 convolutional neural networks (DCNNs) on EEG activity in object recognition tasks. We  
59 compared the activity of four DCNN architectures with human neural recordings during an  
60 object categorization task. We used a stimuli set consisting of identical target objects  
61 embedded in different phase-scrambled backgrounds. The distinction between object  
62 backgrounds and object categories allows us to investigate the influence of either factor for  
63 human subjects and DCNNs. Surprisingly, we found that both human visual processing and  
64 early DCNNs layers dedicate a large proportion of activity to processing object backgrounds  
65 instead of object category. Furthermore, this shared ability to make object backgrounds (and  
66 not just object category) invariant is largely the reason why DCNNs are predictive of brain  
67 dynamics in our experiment. We posit this shared ability to be an important solution for object  
68 categorization. Finally, we conclude that DCNNs, like humans, care deeply about object  
69 backgrounds.

### 70 Introduction

71 Deep convolutional neural networks (DCNNs) have entered the computational modeling  
72 scene with high predictive performance of both object category and brain dynamics during  
73 object categorization tasks (1–4). These predictions on brain dynamics are not limited to low-  
74 level image statistics but also include high-level features such as animacy, object category  
75 and semantics (5–9). In fact, DCNNs' predictive performance on visual processes surpassed  
76 hand-engineered, biologically-inspired models (e.g. Gabor wavelet filtered, HMAX) because  
77 DCNNs are able to achieve high performance on visual tasks (10,11). Traditional mechanistic

## HUMAN VISUAL CORTEX AND DEEP CONVOLUTIONAL NEURAL NETWORKS CARE DEEPLY ABOUT OBJECT BACKGROUND

78 models generally include few parameters and are tested on simplistic, artificial stimuli such  
79 as bar gratings and white noise; in contrast, DCNNs generally include hundreds of thousands  
80 to millions of parameters, and are tested on complex and naturalistic stimuli such as  
81 photographs of real objects or scenes. But, this claim to fame is not without faults as DCNNs  
82 have also been criticized to be black-boxes (12,13) as researchers struggled to understand  
83 how millions of parameters work together to perform tasks such as object categorization (14),  
84 and also predict brain activity without being trained with brain data (15).

85 The criticism towards DCNNs become pointed as studies revealed a divergence between  
86 humans and DCNNs categorization strategies - humans and DCNNs make mistakes on  
87 different images (16–18), DCNNs have an inherent texture bias while humans have an inherent  
88 shape bias (19–22), and DCNNs are susceptible to adversarial attacks imperceptible to  
89 humans (23,24). While these studies point to differences in categorization strategies, they do  
90 not negate the fact that DCNNs can still produce representations which align with human  
91 visual processing (25), as reflected in its high predictive performance of brain dynamics. In  
92 other words, though certain DCNNs categorization outputs are incorrect, we could probe  
93 DCNNs processing stages and find representations which are shared between DCNNs and  
94 humans to understand crucial processing steps (7,26). The right question would then be,  
95 “which representations are useful and robust for solving the task?”

96 In this study, we investigated the factors leading to DCNNs’ high predictive power on human  
97 visual processing within an object categorization task, focusing on essential representations  
98 for solving the task. Prior research has shown the importance of figure-ground segregation  
99 (27,28) - the ability to distinguish an image’s foreground and background (i.e. object and  
100 background). This ability is especially crucial when the object and its background share  
101 similar features such as line orientations, curvatures and colors. Both humans and DCNNs  
102 showed enhanced performance when presented with pre-segmented objects compared to

## HUMAN VISUAL CORTEX AND DEEP CONVOLUTIONAL NEURAL NETWORKS CARE DEEPLY ABOUT OBJECT BACKGROUND

103 objects embedded in backgrounds (29–31). To investigate this further, we used images with  
104 identical target objects embedded in varying background complexities, allowing us to isolate  
105 human electroencephalography (EEG) recordings and DCNN activity related to target object  
106 categorical features versus object background. This approach provides a challenging and  
107 naturalistic task while still maintaining experimental control and enables us to identify  
108 potentially useful representations in object categorization. Surprisingly, we discovered that  
109 large proportions of activity in both human subjects' EEG recordings and DCNNs' activity  
110 relate to the processing of object backgrounds, rather than object category. Our findings  
111 suggest that the ability to distinguish between target object and object background is an  
112 essential representation for object categorization.

## 113 Results

114 In this study, we investigated the factors contributing to the high predictive performance of  
115 Deep Convolutional Neural Networks (DCNNs) in human visual processing dynamics. We  
116 compared human subjects' EEG recordings and DCNN activations using Representational  
117 Similarity Analysis (RSA; see Materials and methods section). Under the RSA framework, we  
118 examined the representations of EEG recordings and DCNN activations using three  
119 categorical representational dissimilarity matrices (RDMs; see Materials and methods  
120 section) - segmentation, background complexity and object category (see Figure 7). First, we  
121 computed partial correlations between the categorical RDMs and EEG RDMs, and between  
122 the categorical RDMs and DCNN RDMs. Second, we qualitatively examined the  
123 representational structure of DCNNs using t-distributed stochastic neighbor embedding  
124 (tSNE; (32)). Results from both the partial correlations and tSNE revealed that both EEG  
125 recordings and DCNN activations shared a high proportion of activity distinguishing between

## HUMAN VISUAL CORTEX AND DEEP CONVOLUTIONAL NEURAL NETWORKS CARE DEEPLY ABOUT OBJECT BACKGROUND

126 objects with and objects without backgrounds. Third, to investigate which processing stage  
127 (i.e. which layer) was most similar between human subjects and DCNNs, we performed  
128 Spearman correlations between EEG RDMs (at every time sample) with DCNN RDMs (per  
129 layer). We showed that DCNN layers which correlate highly with EEG recordings are also  
130 layers which correlate highly with the categorical RDM of segmentation.

131

### 132 ***Object background largely modulates early neural activity in humans***

133 To investigate which of our experimental factors best explained human subjects EEG  
134 recordings, we performed partial correlations between the categorical RDMs with EEG  
135 RDMs. (See Figure 1) The EEG RDMs correlated highly with segmentation; this correlation  
136 had an onset of 86.67ms,  $W = 79$ ,  $p(\text{Bonferonni corrected}) < .01$ . This was followed by a  
137 correlation between the EEG RDMs with background complexity (onset of 90.56ms),  $W =$   
138  $197$ ,  $p(\text{Bonferonni corrected}) < .01$ . Finally, there was a much smaller correlation between the  
139 EEG RDMs with object category (onset of 110ms),  $W = 222$ ,  $p(\text{Bonferonni corrected}) < .01$ .  
140 The order of onset significance started with segmentation and background complexity, both  
141 factors relating to object background, and subsequently arrived at object category. The  
142 correlation between the EEG RDMs with segmentation is significantly higher than the  
143 correlation between the EEG RDMs with background complexity and object category at ~87-  
144 246ms and ~343-409ms,  $p(\text{Bonferonni corrected}) < .01$ . The correlation between the EEG  
145 RDMs with background complexity is significantly higher than the correlation between the  
146 EEG RDMs with object category at ~87-246ms and ~343-413ms,  $p(\text{Bonferonni corrected}) <$   
147  $.01$ . Thus, both factors related to object backgrounds have earlier onsets and higher  
148 correlations as compared to object category. We can infer three things from these results -  
149 1. object background modulates majority of visual processing signals, not object category,

## HUMAN VISUAL CORTEX AND DEEP CONVOLUTIONAL NEURAL NETWORKS CARE DEEPLY ABOUT OBJECT BACKGROUND

150 2. object background modulates visual processing before object category, and 3. the  
151 processing of object background begins early (~87ms) and maintains through ~409ms.

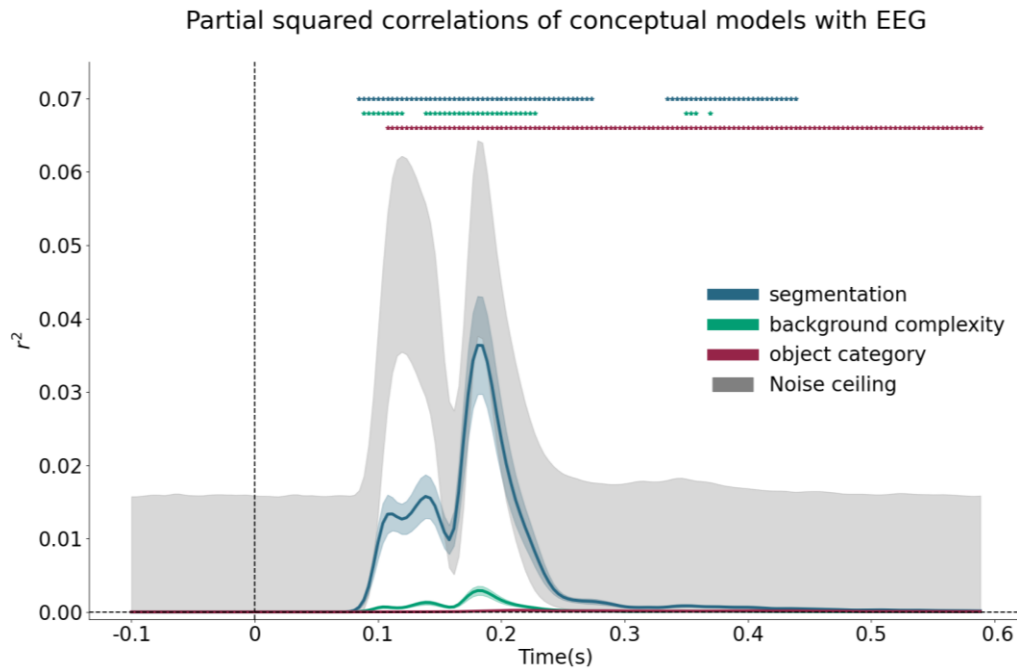

152

153 **Figure 1. Partial squared correlation of conceptual models with EEG RDMs.** By correlating our  
154 categorical RDMs with EEG RDMs, we find that the correlation with segmentation was the largest and  
155 earliest at 86.67ms. This was followed by the correlation with background complexity with an onset at  
156 90.56ms. Finally, the correlation with object category was much smaller and later at 110ms, compared  
157 to both factors related to object backgrounds.

158

### 159 ***Object background largely modulates early layers' activations in DCNNs***

160 Observing that a large proportion of EEG RDMs can be explained by the existence of a  
161 background, we similarly performed the partial correlation with DCNNs' activations,  
162 correlating the categorical RDMs with DCNN RDMs (per layer). We have chosen four  
163 commonly used DCNNs (AlexNet, VGG-16, ResNet-18, ResNet-50) for predicting brain  
164 activity. (See Figure 2) Firstly, we observed that early layers of the DCNNs have high  
165 correlation values with segmentation and background complexity - indicating that a large



## HUMAN VISUAL CORTEX AND DEEP CONVOLUTIONAL NEURAL NETWORKS CARE DEEPLY ABOUT OBJECT BACKGROUND

166 proportion of DCNNs' early activity was related to object background, not object category,  
167 similar to human brains as shown in the previous section. Secondly, we observed that  
168 correlations with object category arose in later layers. In deeper networks (with more layers),  
169 the correlations with object category became much higher towards the penultimate layer as  
170 compared to shallower networks. As a control, we performed the partial correlations between  
171 categorical RDMs and untrained DCNN RDMs. We observed that the correlation for  
172 segmentation (and not background complexity nor object category) similarly captured a large  
173 proportion of untrained DCNNs' activations. However, unlike their trained counterparts,  
174 untrained DCNNs' correlations arose more gradually and remained until the penultimate  
175 (fully-connected) layer. The correlation for background complexity and object category  
176 remained close to null throughout the untrained DCNN layers. This indicates that the  
177 background differences in untrained DCNNs were not resolved or made invariant, unlike their  
178 trained counterparts. Presumably, this transformation of making backgrounds invariant  
179 allowed the networks to learn object categorically relevant features.

## HUMAN VISUAL CORTEX AND DEEP CONVOLUTIONAL NEURAL NETWORKS CARE DEEPLY ABOUT OBJECT BACKGROUND

180

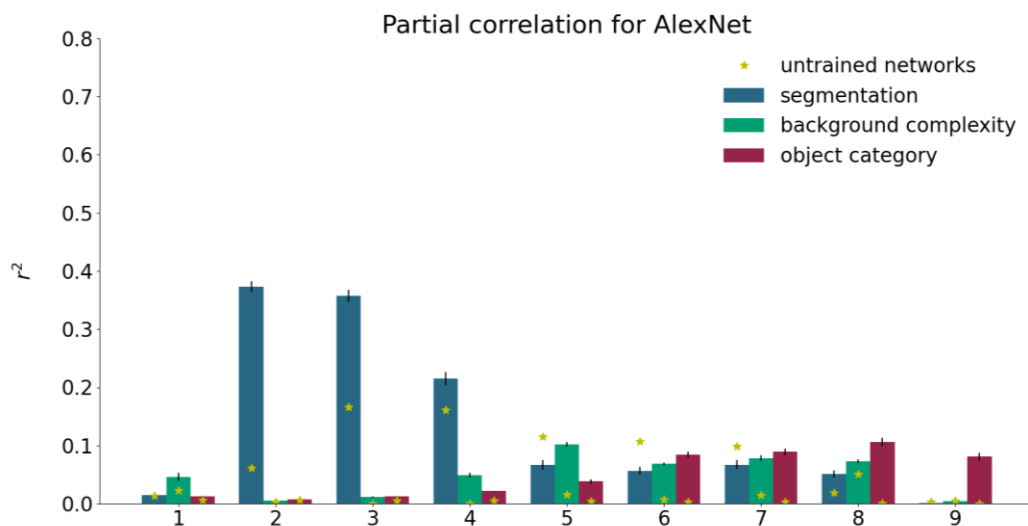

181

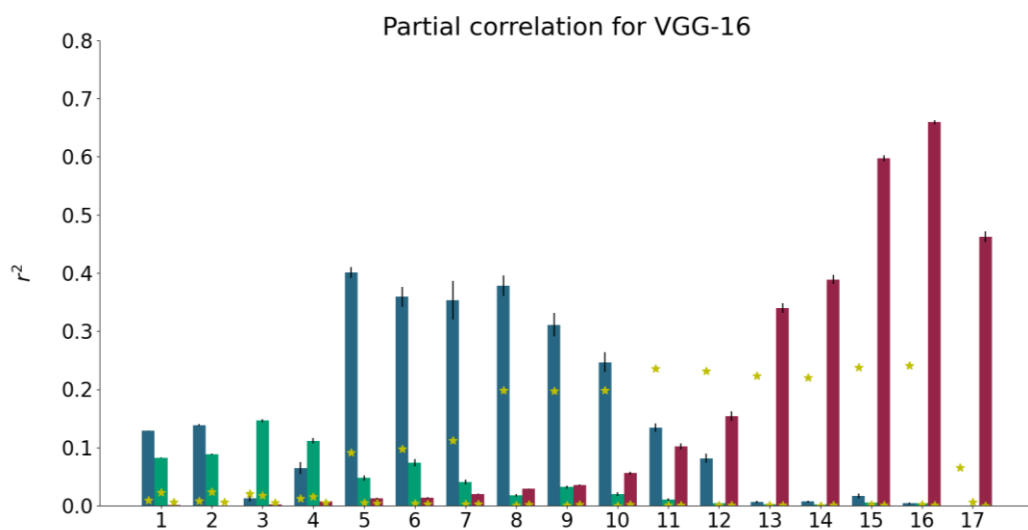

182

## HUMAN VISUAL CORTEX AND DEEP CONVOLUTIONAL NEURAL NETWORKS CARE DEEPLY ABOUT OBJECT BACKGROUND

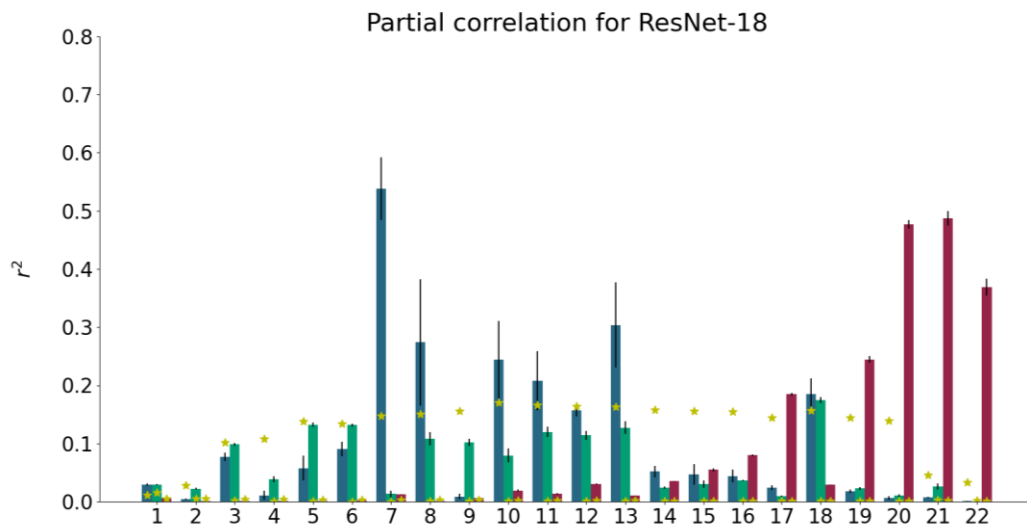

183

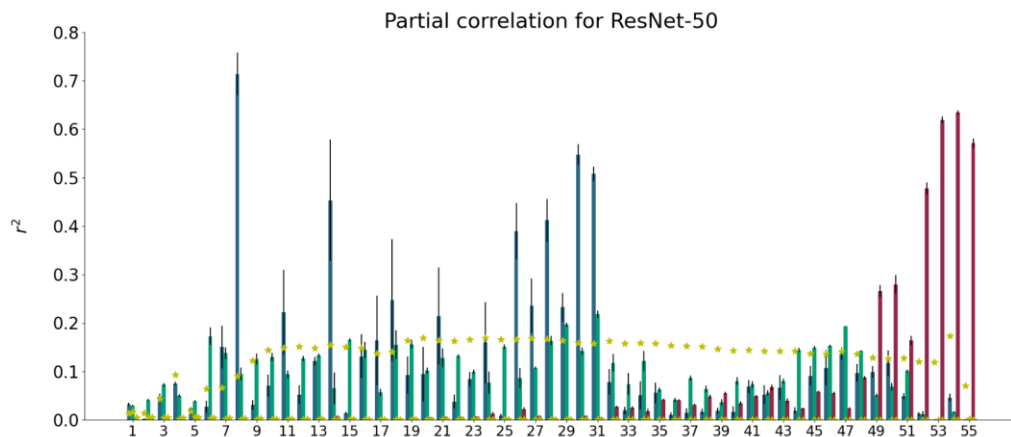

184

185 **Figure 2. Partial correlation of categorical RDMs with DCNNs.** The partial correlations between  
186 categorical RDMs (segmentation, background complexity and object category) and DCNN RDMs are  
187 shown for each layer of the network. Partial correlations for untrained DCNN RDMs are marked by the  
188 yellow stars. Values on the x-axis indicate layer number; values on the y-axis indicate the layer's partial  
189 correlation (in  $r^2$ ) with the categorical RDMs. We observed that the early layers of DCNNs correlate  
190 largely with both segmentation and background complexity but not with object category. The  
191 correlation with object category gradually increases in the later layers, with deeper networks showing  
192 a larger increase compared to shallower networks. This pattern of correlation is robust across all  
193 networks.

## HUMAN VISUAL CORTEX AND DEEP CONVOLUTIONAL NEURAL NETWORKS CARE DEEPLY ABOUT OBJECT BACKGROUND

194 To further understand the network activations, we visualized its activity with t-distributed  
195 stochastic neighbor embedding (tSNE; (32)). tSNE maps high-dimensional data points to 2D  
196 or 3D spaces. We selected to visualize the activations of DCNNs' first and final layers, and  
197 also the layer with the highest correlation with human subjects EEG recordings. The tSNE  
198 visualization showed that with DCNNs layers which correlate most with EEG RDMs, its  
199 activation is differentiated along object background - not object category (see Figure 3). In  
200 the first layer of all networks, we see a random initialization with no clear clustering of stimuli.  
201 In the layer which correlates most with brain activity, we see a clustering of activity according  
202 to object backgrounds. And in the final layer, we see a clustering of activity according to  
203 object category. With the tSNE visualization, we showed that DCNNs activity differentiates  
204 first according to object background and then according to object category. One notable  
205 exception of this pattern of results is AlexNet; in its output layer (layer 9), its activity is still  
206 clustered along object background. An explanation could be that AlexNet is a much shallower  
207 network compared to the other three networks, the lack of depth and additional processing  
208 prevents the network from differentiating the stimuli according to their categories.

209 As these layers with activations differentiating object background correlate with brain activity,  
210 we can infer that DCNNs activity are related to processing object backgrounds. This finding  
211 is different from other similar studies using DCNNs because we show that DCNNs layers  
212 which capture differences related to object background are also layers which best explain  
213 human subject EEG recordings. Additionally, we show that DCNNs layers which capture  
214 differences related to object category are also layers which explained the least amount of  
215 variance. Thus, both representations from DCNNs and human subjects capture features from  
216 object backgrounds, not object category. As such, we posit that the predictive power of  
217 DCNNs on brain activity is largely derived from its ability to differentiate object backgrounds,  
218 or more specifically, image textures (19).

## HUMAN VISUAL CORTEX AND DEEP CONVOLUTIONAL NEURAL NETWORKS CARE DEEPLY ABOUT OBJECT BACKGROUND

219 ■ segmented ■ medium complexity ◆ birds ★ frisbees + suitcases  
■ low complexity ■ high complexity ● cats ▶ fire hydrants

tSNE of activity in AlexNet

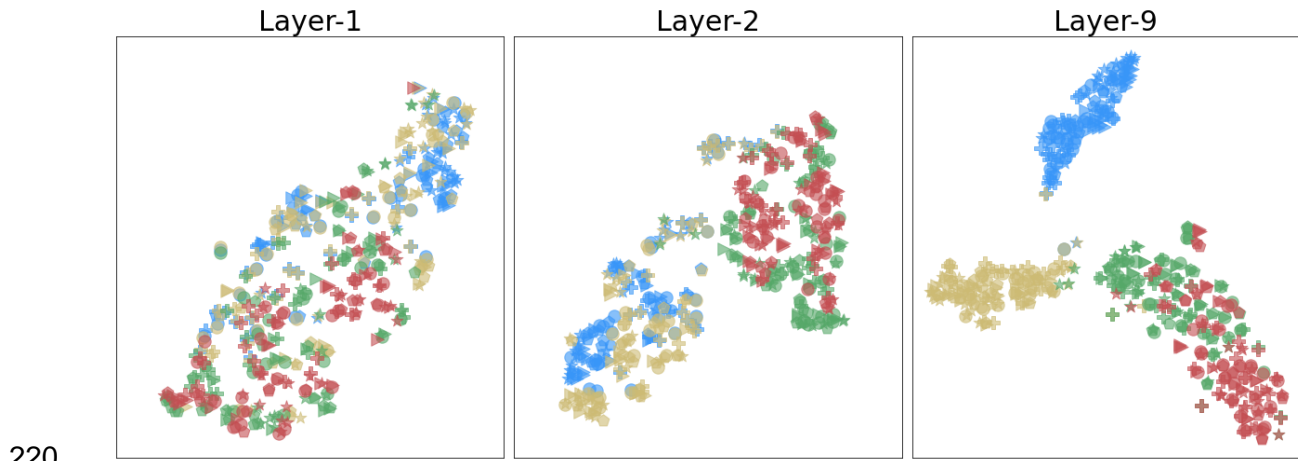

tSNE of activity in VGG-16

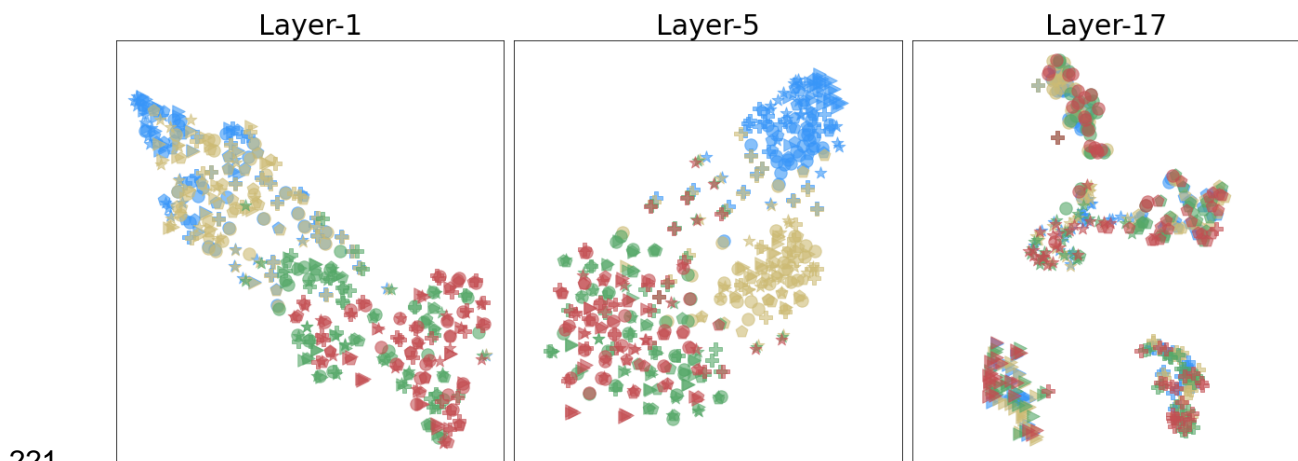

tSNE of activity in ResNet-18

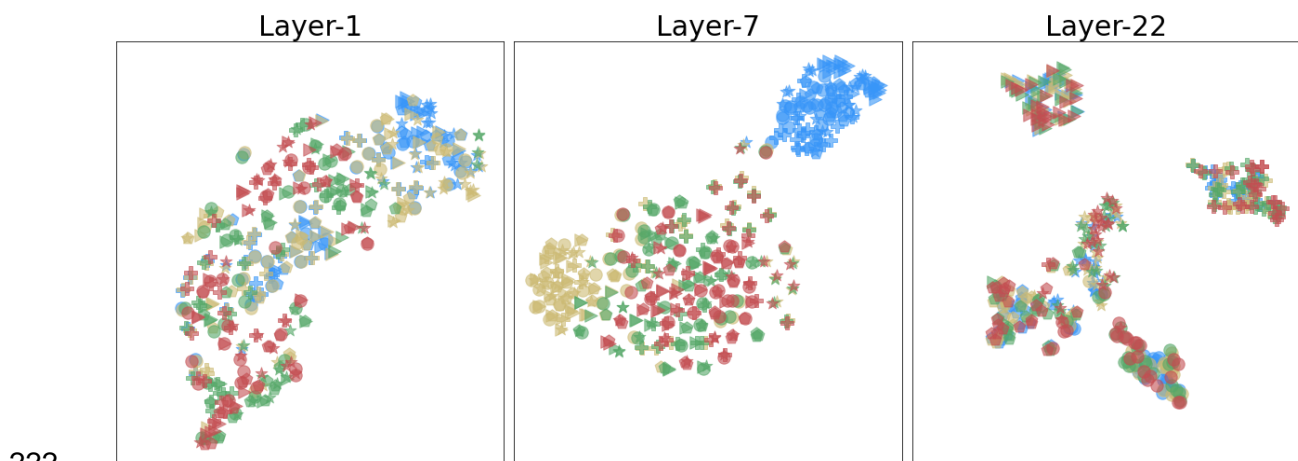

## HUMAN VISUAL CORTEX AND DEEP CONVOLUTIONAL NEURAL NETWORKS CARE DEEPLY ABOUT OBJECT BACKGROUND

tSNE of activity in ResNet-50

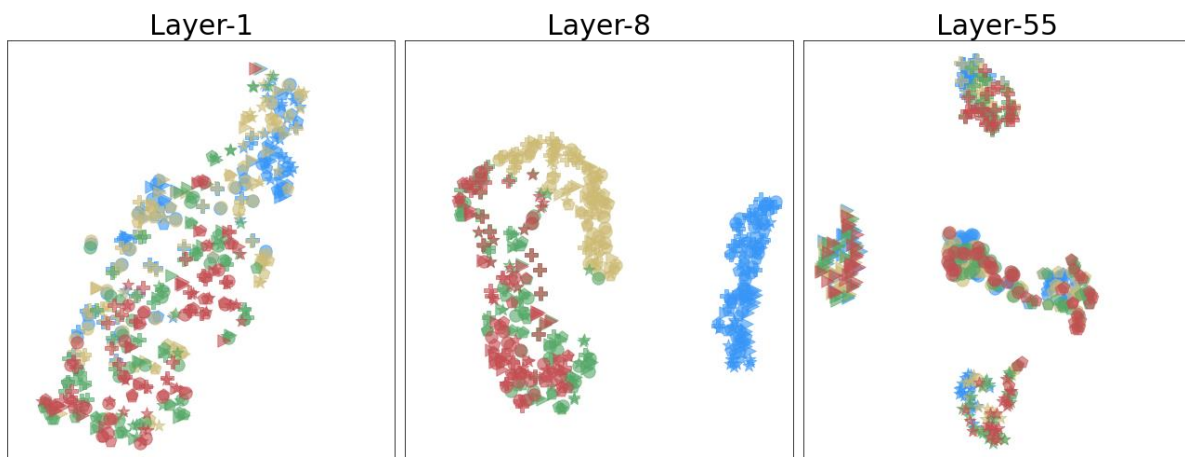

223

224

**Figure 3. tSNE of DCNNs activations.** We applied tSNE to DCNNs' activations in the first and last

225

layers, and also the layer which correlated most with brain activity. Colors indicate object

226

background conditions - segmented (blue), low complexity (yellow), medium complexity (green), high

227

complexity (red). Markers indicate object category - bird (crosses), cat (circles), frisbee (stars), fire

228

hydrant (triangles), suitcase (plusses). We observed that DCNNs' activity were differentiated along

229

object background – not object category. In the first layer of all networks, we see a random

230

initialization with no clear clustering of stimuli. In the layer which correlates most with brain activity,

231

we see a clustering of activity according to object background (in colors). In the final layer, we see a

232

clustering of activity according to object category (in marker shapes). Here, we show that DCNNs

233

activity differentiates first according to object background and then according to object category.

234

235

### ***Object background predicts brain activity better than DCNNs***

236

Though DCNNs have been touted as the best available mechanistic models, they fell short

237

in explaining human subject EEG recordings as compared to the categorical RDM of

238

segmentation. We have chosen four commonly used DCNNs (AlexNet, VGG-16, ResNet-18,

239

ResNet-50) for predicting brain activity. For each DCNN, we correlated its activation RDMs

240

(per layer) with EEG RDMs (per time sample). (See Figure 4) We observed that AlexNet's

241

second convolutional layer correlates best with EEG RDMs, followed by VGG-16's fifth

## HUMAN VISUAL CORTEX AND DEEP CONVOLUTIONAL NEURAL NETWORKS CARE DEEPLY ABOUT OBJECT BACKGROUND

242 convolutional layer, then ResNet-50's eighth convolutional layer, and finally ResNet-18's  
243 seventh convolutional layer. Out of the four DCNNs, only AlexNet reached the noise ceiling  
244 of the EEG RDMs; whereas, the other networks fell far from the noise ceiling, especially  
245 when compared to the categorical RDM of segmentation. We also performed Welch's t-test  
246 between the correlations of DCNNs and EEG, and the correlations of segmentation and  
247 EEG, and found that the correlations of DCNNs and EEG significantly differed from the  
248 correlations of segmentation and EEG. With the exception of AlexNet conv2 layer - which  
249 had higher explained variance as compared to segmentation within the early time window  
250 (< ~160ms), all networks have lower explained variances as compared to segmentation.

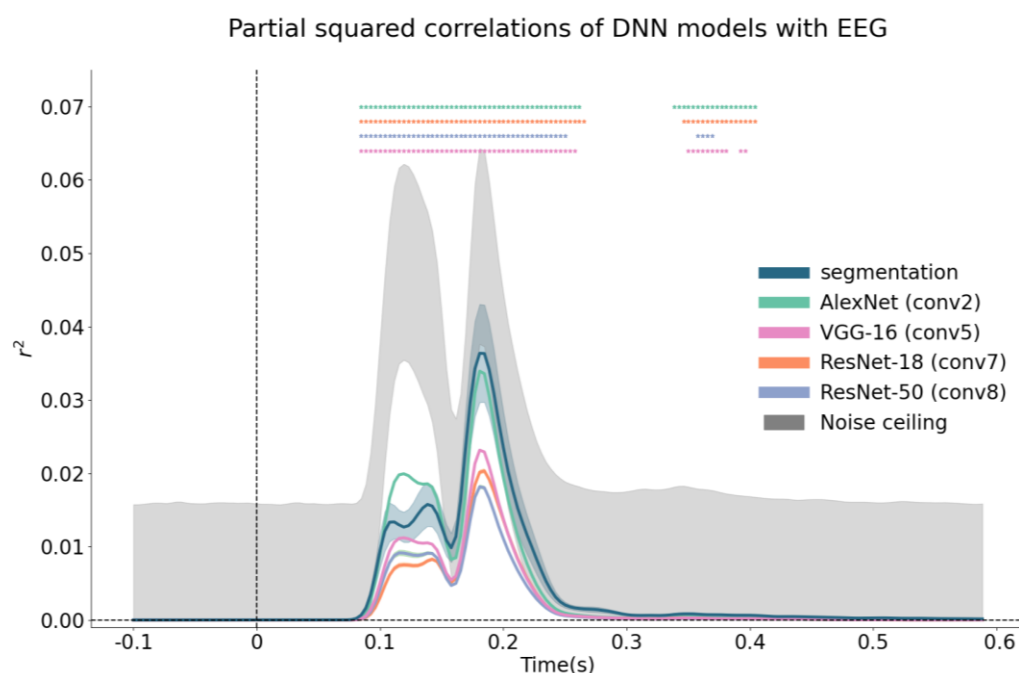

251  
252 **Figure 4. Best correlating DCNNs layers with EEG.** We correlated DCNN RDMs (per layer) with EEG  
253 RDMs and observed that only AlexNet's second convolutional layer was close to the noise ceiling of  
254 the EEG data. AlexNet was also the only network which surpassed the explained variance of the  
255 segmentation model in the earlier time window (< ~160ms). All other network layers failed to reach the  
256 noise ceiling and did not correlate as well with EEG RDMs as compared to the categorical RDM of  
257 segmentation.

## HUMAN VISUAL CORTEX AND DEEP CONVOLUTIONAL NEURAL NETWORKS CARE DEEPLY ABOUT OBJECT BACKGROUND

258 ***DCNNs layers which correlate highly with EEG RDMs also correlate highly with***  
259 ***segmentation***

260 After observing that both EEG RDMs and DCNNs RDMs correlate highly with the categorical  
261 RDM of segmentation (see Figure 1 and 2), we wanted to investigate the relationship between  
262 the RDMs from EEG RDMs, DCNNs RDMs and the categorical RDMs. More specifically, we  
263 examined if the correlation values of EEG with a categorical RDM (e.g. segmentation), and  
264 the correlation values of DCNNs with the same categorical RDM, correlated with each other.  
265 By doing so, we directly investigate if DCNNs' layers which correlate with a categorical RDM,  
266 also correlate well with EEG. This correlation analysis gives us a bridge between EEG and  
267 DCNNs to observe if their correlation with a categorical RDM helps explain DCNNs' predictive  
268 power on EEG dynamics. Thus, we took the correlation values of DCNNs with the three  
269 categorical RDMs (one datapoint per layer, averaged across five initializations) and plotted  
270 its correlation with EEG. We observed that DCNNs RDMs which correlates highly with EEG  
271 RDM also correlate highly with the categorical RDM of segmentation (AlexNet,  $r=0.99$ ,  
272  $p<0.01$ ; VGG-16,  $r=0.88$ ,  $p<0.01$ ; ResNet-18,  $r=0.64$ ,  $p<0.01$ ; ResNet-50,  $r=0.62$ ,  $p<0.01$ ).  
273 This indicates that DCNNs' correlation with brain activity is derived from its ability to  
274 distinguish between objects' backgrounds. DCNNs RDMs which correlate highly with  
275 background complexity, share a moderate correlation with EEG RDM (AlexNet,  $r=-0.56$ ,  
276  $p=0.11$ ; VGG-16,  $r=0.11$ ,  $p=0.67$ ; ResNet-18,  $r=0.38$ ,  $p=0.08$ ; ResNet-50,  $r=0.27$ ,  $p=0.04$ ).  
277 DCNNs RDMs which correlate highly with the categorical RDM of object category actually  
278 have a negative correlation with EEG RDMs (AlexNet,  $r=-0.62$ ,  $p=0.08$ ; VGG-16,  $r=-0.72$ ,  
279  $p<0.01$ ; ResNet-18,  $r=-0.35$ ,  $p=0.11$ ; ResNet-50,  $r=-0.12$ ,  $p<0.38$ ).



## HUMAN VISUAL CORTEX AND DEEP CONVOLUTIONAL NEURAL NETWORKS CARE DEEPLY ABOUT OBJECT BACKGROUND

DCNNs layers which correlate well with segmentation,  
also correlate well with EEG

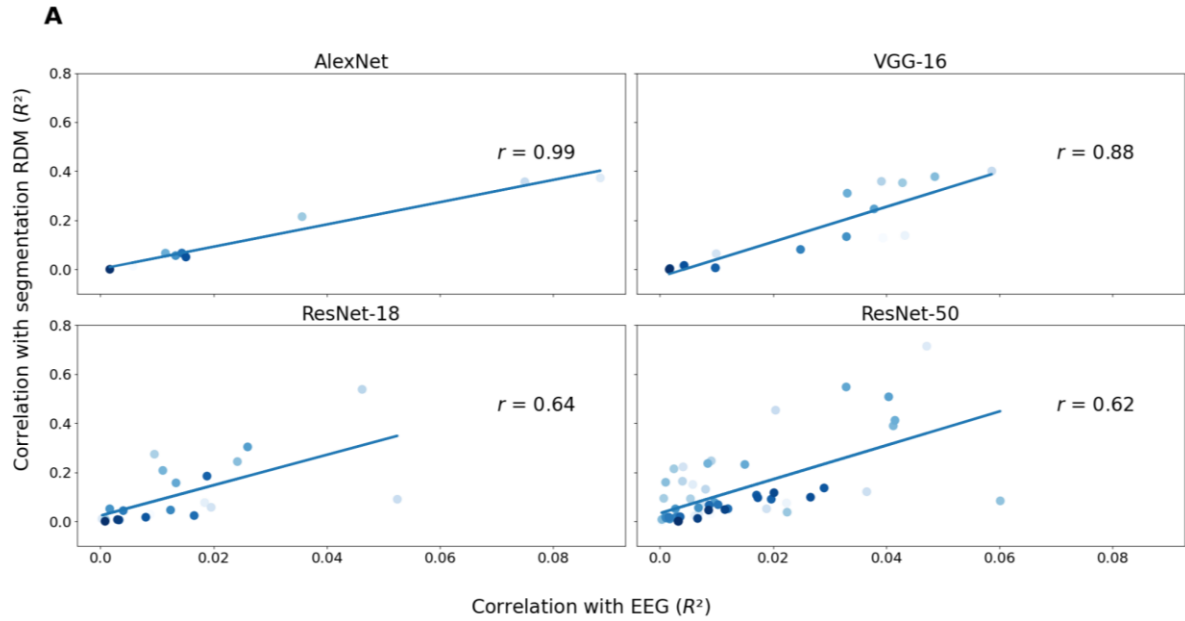

280

DCNNs layers which correlate moderately with complexity,  
correlate moderately with EEG

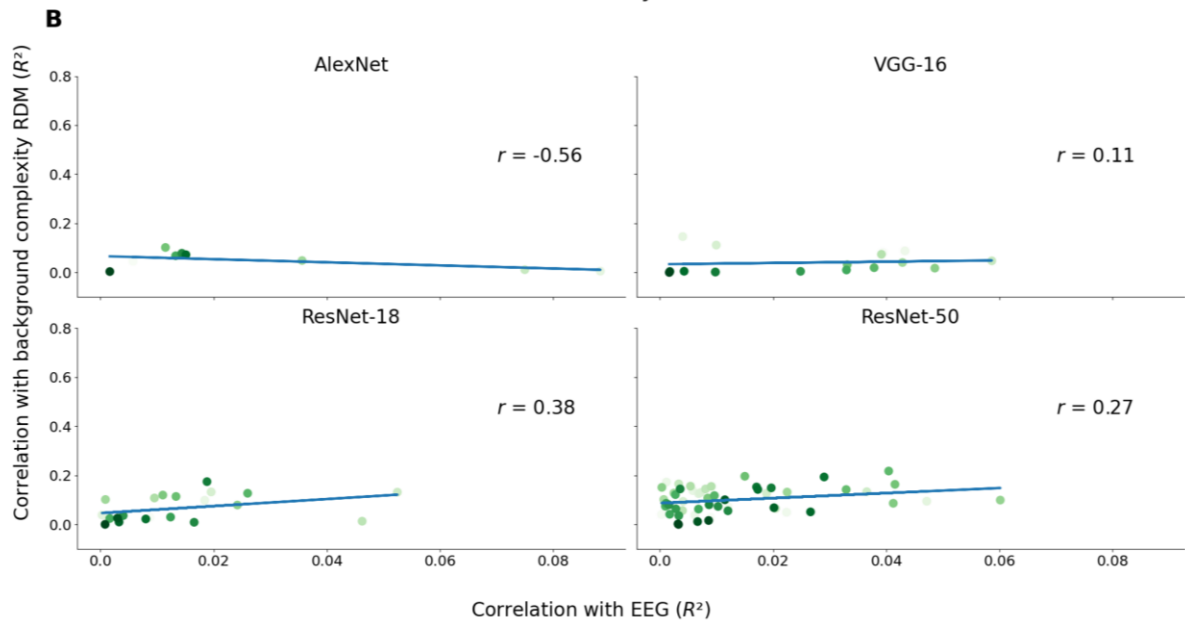

281

## HUMAN VISUAL CORTEX AND DEEP CONVOLUTIONAL NEURAL NETWORKS CARE DEEPLY ABOUT OBJECT BACKGROUND

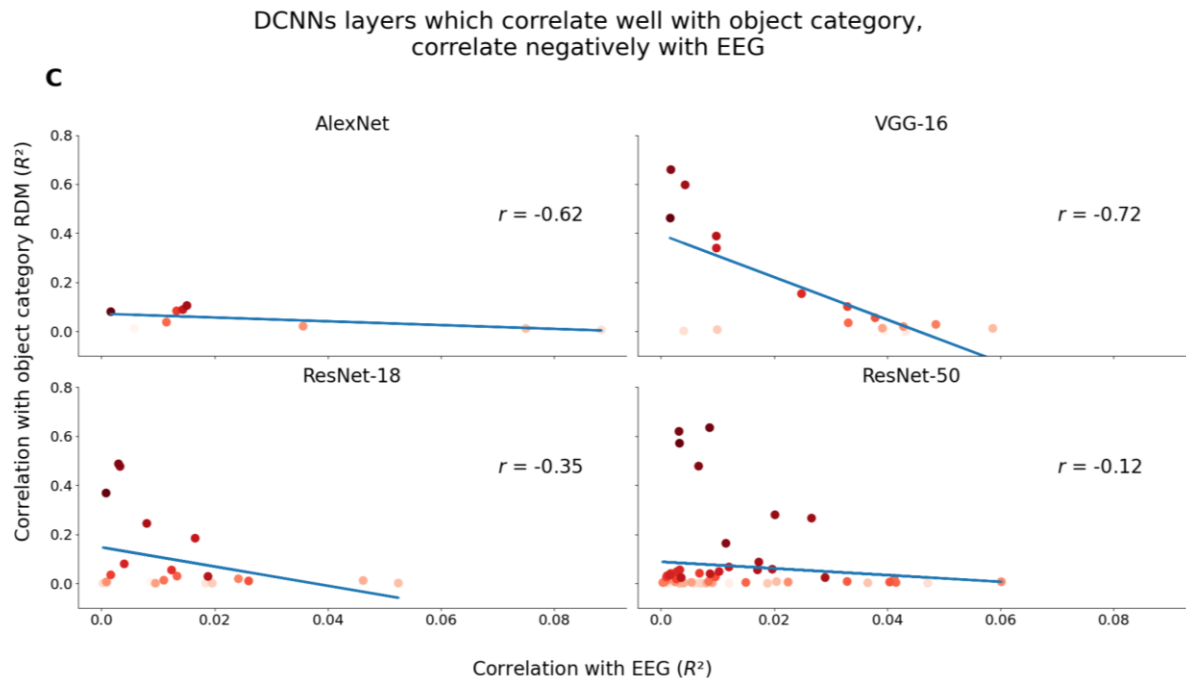

282

283 **Figure 5. Relationship between DCNNs correlation with EEG and categorical RDMs.** Each dot

284 represents a DCNN layer (averaged across five initializations). Darker colors indicate deeper layers

285 within a network and lighter colors indicate shallower layers. A) We observed that layers which

286 correlate highly with EEG are also layers which correlate with the categorical RDM of segmentation.

287 B) There is a moderate relationship between DCNNs' correlation with EEG and the categorical RDM

288 of background complexity; and C) a negative correlation between DCNNs' correlation with EEG and

289 the categorical RDM of object category - indicating that DCNN layers which correlate highly with object

290 category actually become dissimilar with EEG RDMs.

## 291 Discussion

292 We set out to investigate the factors leading to DCNNs' high predictive performance on

293 human visual processing dynamics by studying objects and their backgrounds. Using

294 representational similarity analysis (RSA; (33)), we compared the activity of four DCNN

295 architectures with electroencephalography (EEG) recordings of human participants. We

296 focused on three factors: segmentation, background complexity and object category. First,

## HUMAN VISUAL CORTEX AND DEEP CONVOLUTIONAL NEURAL NETWORKS CARE DEEPLY ABOUT OBJECT BACKGROUND

297 we found that object background largely modulates early EEG signals and early DCNNs  
298 layers. Second, we found that both representations from EEG and DCNNs reflected the  
299 distinction between objects with and without backgrounds. Third, we showed that the shared  
300 distinction of object backgrounds is associated with DCNNs' high predictive performance on  
301 human visual processing dynamics. We posit that DCNNs' ability to predict EEG signals is  
302 derived from its ability to distinguish between target object and object backgrounds.

303

### 304 ***Processing of object backgrounds in humans happens earlier and is more*** 305 ***substantial than processing of object features***

306 We found high correlations between the categorical RDMs of segmentation and background  
307 complexity with EEG - revealing that visual processing (as recorded with EEG) is largely  
308 modulated by object backgrounds instead of object category (see Figure 1). Furthermore, the  
309 correlations between segmentation and background complexity with EEG have earlier onsets  
310 compared to object category - segmentation at 86.67ms, background complexity at  
311 90.56ms, and object category at 110ms. Our result suggests that the processing of object  
312 background precedes object features and through this process target objects and their  
313 backgrounds becomes distinct. This is evident not only in the latency of significant correlation  
314 between the conceptual models and EEG, but also in the correlation between the conceptual  
315 models and DCNNs layers - where correlations with segmentation and background  
316 complexity precedes object category.

317 Our finding agrees with previous findings showing that object background complexity  
318 influences object categorical perception, with objects embedded in more complex  
319 backgrounds to reach categorical perception later (34,35). The longer latency for categorical  
320 perception could be explained by time taken to distinguish between the target object and its  
321 background. Additionally, our result also extends initial findings that categorical perception

## HUMAN VISUAL CORTEX AND DEEP CONVOLUTIONAL NEURAL NETWORKS CARE DEEPLY ABOUT OBJECT BACKGROUND

322 is fast (within 150ms) (36,37). Results from earlier studies demonstrating the quickness of  
323 categorical perception holds when the presented stimuli was simple (i.e. object with a plain  
324 background); however, if the presented stimuli was more complex (i.e. object with a complex  
325 background), longer latency incorporating additional processing steps would be required  
326 (38). As natural scenes comprises a myriad of complexities in backgrounds, we recommend  
327 a careful consideration of not only object category but also backgrounds.

328

### 329 ***DCNNs processes on object backgrounds are explaining EEG activity***

330 In our experiment, we show that DCNNs predictive power on EEG data is derived from  
331 DCNNs' inherent ability to distinguish between objects with and without backgrounds.  
332 Crucially, the distinction of object backgrounds is orthogonal to the object categorization  
333 task. The selected DCNNs for the experimental task have been pre-trained on a naturalistic  
334 dataset (ImageNet), and further optimized with a separate dataset (MSCOCO). Nonetheless,  
335 DCNNs activations reflect a distinction between objects with and without backgrounds. The  
336 distinction is apparent in its partial correlation with the categorical RDMS of segmentation  
337 and background complexity (see Figure 2), especially in DCNNs early and mid-layers.  
338 Additionally, we also showed that DCNNs layers which correlated with segmentation also  
339 correlated with EEG (see Figure 5), suggesting that DCNNs' predictive power on EEG data is  
340 largely derived from the shared ability of both modalities to distinguish between the target  
341 object and its background.

342 Our conclusion that DCNNs' predictive power on EEG data is derived from the shared ability  
343 of both modalities to distinguish between objects' backgrounds needs to be considered  
344 carefully because we have reconstructed an experimental dataset with target objects  
345 embedded within artificial backgrounds. There is a high necessity to identify the target object  
346 as separate from its background because the artificial backgrounds are uninformative on the

## HUMAN VISUAL CORTEX AND DEEP CONVOLUTIONAL NEURAL NETWORKS CARE DEEPLY ABOUT OBJECT BACKGROUND

347 object category. In contrast, if the object category correlated with its background (e.g. frisbee  
348 with the background of a park), and if the discrimination of object categories could be  
349 performed sufficiently well based on the object backgrounds, no distinction needs to be  
350 made between target objects and their backgrounds. In reality, most naturalistic scenes will  
351 have backgrounds which are informative of its target objects' categories as these are a matter  
352 of statistical correlations. In our study, we constructed an object categorization task which  
353 required the distinction of target object and its background with the intention of investigating  
354 the mechanism of figure-ground segmentation; surprisingly, we found that both DCNNs and  
355 our human subjects shared this ability.

356

### 357 ***Emergence of shared solutions for object categorization***

358 The shared ability to distinguish between target objects and their backgrounds within human  
359 visual processing and DCNNs affords us to ask a follow up question - "Why does it exist?"  
360 This ability was not directly implemented in both systems yet emerged as part of the solution  
361 for categorizing objects. Within vision neuroscience, this ability to distinguish between target  
362 objects and its backgrounds has long been studied as part of processes known as perceptual  
363 grouping or figure-ground segmentation (27,28,39-42). Specifically, these processes refer to  
364 the grouping of image elements which belong to different entities. It has been shown that if  
365 these processes were interrupted in human subjects, object categorization becomes  
366 impaired (43). In our study, the emergence of a shared solution (i.e. perceptual grouping) for  
367 object categorization suggests it to be a crucial solution for the task at hand and could  
368 elucidate the evolutionary constraints on the problem (44). This helps us arbitrate which  
369 biological processes are necessary to incorporate in artificial systems depending on their  
370 contexts.

371

## HUMAN VISUAL CORTEX AND DEEP CONVOLUTIONAL NEURAL NETWORKS CARE DEEPLY ABOUT OBJECT BACKGROUND

### 372 ***Figure-ground segregation assists object features learning***

373 Previous research has shown the surprising prediction performance of random weights  
374 networks (26,45,46); it is indeed impressive that random weights networks are able to explain  
375 any brain activity at all. Our experimental results similarly showed that untrained networks  
376 can explain variance in brain activity through its inherent ability to process low-level image  
377 statistics. Through correlating untrained networks RDMs with conceptual RDMs, we find that  
378 the networks' activity is modulated only by object background and not object category at all  
379 (see Figure 2). We observed a similar predictive performance of an untrained network on V1  
380 in previous studies, where the correlation of the untrained network gradually increased in the  
381 early layers and remained until the late layers (46). In our study, we observed that the  
382 conceptual RDMs of segmentation correlated highly with the layers of untrained networks,  
383 whereas, the conceptual RDMs of background complexity and object category did not  
384 correlate with the layers of untrained networks. This indicates that untrained networks are  
385 able to distinguish between objects with and without backgrounds, but are unable to  
386 distinguish between the background types or categorical features. In contrast, layers of  
387 trained networks show a correlation with segmentation up until the middle layers of the  
388 network which then gradually decreased, matched by the gradual increase of correlation with  
389 object category. This suggests that trained networks “resolved” figure-ground segregation,  
390 allowing it to learn object categorical features.

### 391 **Conclusion**

392 In summary, we have tested the best mechanistic models of visual processing and showed  
393 that both early human visual processing and early DCNN layers are highly modulated by  
394 object background, not object category. Moreover, the shared ability to distinguish between

## HUMAN VISUAL CORTEX AND DEEP CONVOLUTIONAL NEURAL NETWORKS CARE DEEPLY ABOUT OBJECT BACKGROUND

395 object backgrounds explains DCNNs' predictive power on EEG activity. Neither humans nor  
396 DCNNs were explicitly taught to distinguish between object backgrounds but the shared  
397 solution emerged to resolve the experimental task of object categorization. Altogether, we  
398 have shown that both human visual processing and DCNN care deeply about the object  
399 backgrounds.

## 400 Materials and methods

### 401 Data

402 The electrophysiological data are from (35), it consists of electroencephalography (EEG)  
403 recordings from human subjects ( $n=62$ , 18-35 years old). For a brief description of the  
404 experimental paradigm and example of stimuli, please see Figure 6.

## HUMAN VISUAL CORTEX AND DEEP CONVOLUTIONAL NEURAL NETWORKS CARE DEEPLY ABOUT OBJECT BACKGROUND

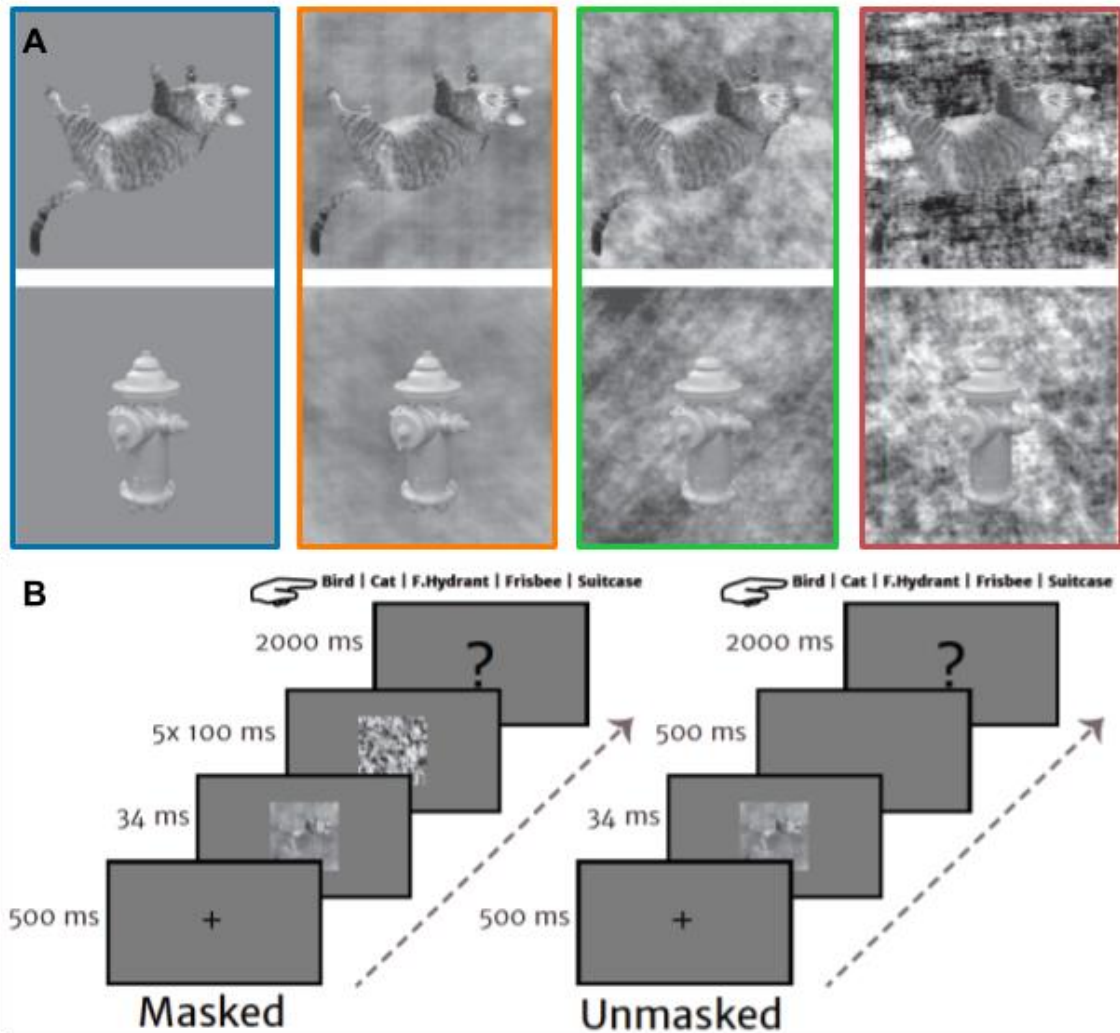

405

406 **Figure 6. Stimuli sample and experimental paradigm.** A) Two object exemplars (cat and fire hydrant)

407 are displayed across four background types. The first (highlighted in blue) is a uniform gray

408 background, referred to as the “segmented” condition. The second (highlighted in orange), third

409 (highlighted in green) and fourth (highlighted in red) are a low, medium and high complexity background

410 respectively.. The increasing levels of background complexity makes it increasingly difficult to

411 differentiate the target object from its background. B) The experimental paradigm had human subjects

412 perform an object categorization task. Each trial starts with a fixation cross of 500ms, followed by a

413 stimulus presentation of 34ms. For masked trials, stimulus presentation is followed by five visual

414 masks, each presented for 100ms. For unmasked trials, the stimulus presentation is followed by a

415 blank screen for 500ms. Finally, there is a response screen displaying the five object category

416 for 2000ms. Participants completed a total of 960 trials - 120 trials per image condition both masked



## HUMAN VISUAL CORTEX AND DEEP CONVOLUTIONAL NEURAL NETWORKS CARE DEEPLY ABOUT OBJECT BACKGROUND

417 and unmasked. In this paper, only the unmasked trials were used as our study did not pertain to a  
418 comparison of feedforward versus feedback processing. Figure taken from (35).

419

### 420 **Stimuli**

421 The stimuli used consisted of 120 unique target objects (24 per category) from five categories  
422 (bird, cat, fire hydrant, frisbee, and suitcase), embedded within four background types  
423 (uniform gray background, low complexity, medium complexity and high complexity). This  
424 gave us a total of 480 unique stimuli. The backgrounds were created by phase-scrambling  
425 the original image backgrounds to remove information aiding recognition of the target object.  
426 The complexity of these phase-scrambled backgrounds varied with contrast, with higher  
427 contrast indicating higher complexity. The segmented condition does not have phase-  
428 scrambled backgrounds but a uniform gray one. The stimuli were presented at a resolution  
429 of 512 x 512 pixels.

430

### 431 **Deep convolutional neural networks (DCNNs)**

432 We selected four established DCNN architectures, commonly used in computational  
433 modeling - AlexNet (47), VGG-16 (48), ResNet-18 and ResNet-50 (49). Five different seeds of  
434 each network were initialized and trained with the ImageNet Large Scale Visual Recognition  
435 Challenge 2012 (ILSVRC) dataset, then fine-tuned to the experimental object categories with  
436 the Microsoft COCO dataset (50). We used different seeds to capture variance between  
437 different initializations and obtain reliable results (51). For the initial training on ILSVRC, we  
438 used a learning rate of 0.1 (except for VGG-16 which needed a lower learning rate of 0.05)  
439 with a learning rate decay of 0.1 every 30 epochs and a weight decay of  $1e-4$ . We also used  
440 a stochastic gradient optimizer with a momentum of 0.9. AlexNet, ResNet-18 and ResNet-50  
441 were trained for 150 epochs while VGG-16 was trained for 74 epochs. All DCNNs reached

## HUMAN VISUAL CORTEX AND DEEP CONVOLUTIONAL NEURAL NETWORKS CARE DEEPLY ABOUT OBJECT BACKGROUND

442 similar performance accuracies reported in the original papers. For fine-tuning, we replaced  
443 the last fully-connected layer and retrained weights from all layers. We fine-tuned the network  
444 with a learning rate of  $1e-3$  with a learning rate decay of 0.1 every 7 epochs. The fine-tuning  
445 was performed for 20 epochs. We also used a stochastic gradient descent optimizer with a  
446 momentum of 0.9 for fine-tuning. In addition to trained networks, we initialized five different  
447 seeds of each architecture with no training as untrained networks. All DCNNs training and  
448 fine-tuning was done in PyTorch (52).

449

### 450 **Analysis: Representational Similarity Analysis (RSA)**

451 We used the framework of Representational Similarity Analysis (RSA; (33) to compare EEG  
452 activity with DCNNs activations. RSA is a method of analysis allowing for the comparison  
453 between different modalities by first generating a representational structure of the stimuli set  
454 as reflected in brain activity (as recorded using EEG sensors) and DCNNs (as reflected  
455 through its unit activations), and then comparing both those representational structures. This  
456 abstraction from EEG sensors and DCNNs unit activations allows us to compare the  
457 transformations performed by both modalities on the stimuli. Using RSA, we obtained time-  
458 resolved EEG activity and layerwise DCNN activations in the form of representational  
459 dissimilarity matrices (RDMs). The RDMs consist of pairwise distances computed from  
460 multivariate responses (i.e. pattern of EEG activity or pattern of layerwise DCNNs activations)  
461 towards every possible stimuli pair. Pairwise distances were computed as  $(1 -$   
462 *Pearson correlation*). An entry in the RDM between stimuli A and B would be  $- 1 -$   
463 *Pearson correlation of multivariate responses towards stimuli A and B*; whereas, an entry  
464 in the RDM between stimuli A and A would be 0. With 480 unique stimuli (120 unique objects  
465 x 4 background types), we obtained 480x480 RDMs. In all analyses using RDMs, we used  
466 only the upper triangle (excluding the diagonal) since the RDMs are symmetrical.

## HUMAN VISUAL CORTEX AND DEEP CONVOLUTIONAL NEURAL NETWORKS CARE DEEPLY ABOUT OBJECT BACKGROUND

467 RDMs of EEG recordings were computed using 22 posterior electrodes (Iz, I1, I2, Oz, O1, O2,  
468 POz, PO3, PO4, PO7, PO8, Pz, P1, P2, P3, P4, P5, P6, P7, P8, P9, P10). These electrodes  
469 are chosen to focus on activity from visual processing areas and were confirmed in previous  
470 studies (34,35). The electrodes placement followed a 10-10 layout, modified with two  
471 additional occipital electrodes (I1 and I2) replacing two frontal electrodes (F5 and F6). RDMs  
472 were computed from every time sample from -100ms to 600ms relative to stimulus onset.  
473 RDMs of DCNNs activations were obtained from activity of all convolutional, pooling and  
474 fully-connected layers.

475 In addition to RDMs from EEG and DCNNs, we also constructed categorical RDMs to  
476 evaluate the main effects of our experimental manipulations. We built three categorical RDMs  
477 - segmentation, background complexity and object category (see Figure 7). All three RDMs  
478 consisted of binary values: “0” representing pairs from the same group, and “1” representing  
479 pairs from different groups. Segmentation distinguishes between stimuli with and without  
480 backgrounds (see Figure 7A). Background complexity distinguishes between the four  
481 background types (see Figure 7B): segmented (no background), low complexity, medium  
482 complexity and high complexity. Object category distinguishes between the five object  
483 categories (see Figure 7C). Here, it should be noted that the categorical RDMs of  
484 segmentation and background complexity correlate substantially ( $r = .45$ ), because the  
485 segmented stimuli all have the same complexity (i.e., 0; see Figure 7A & B). As such, to  
486 separate the variance associated with segmentation or background complexity, we  
487 performed partial correlations between the categorical RDMs and EEG RDMs.

## HUMAN VISUAL CORTEX AND DEEP CONVOLUTIONAL NEURAL NETWORKS CARE DEEPLY ABOUT OBJECT BACKGROUND

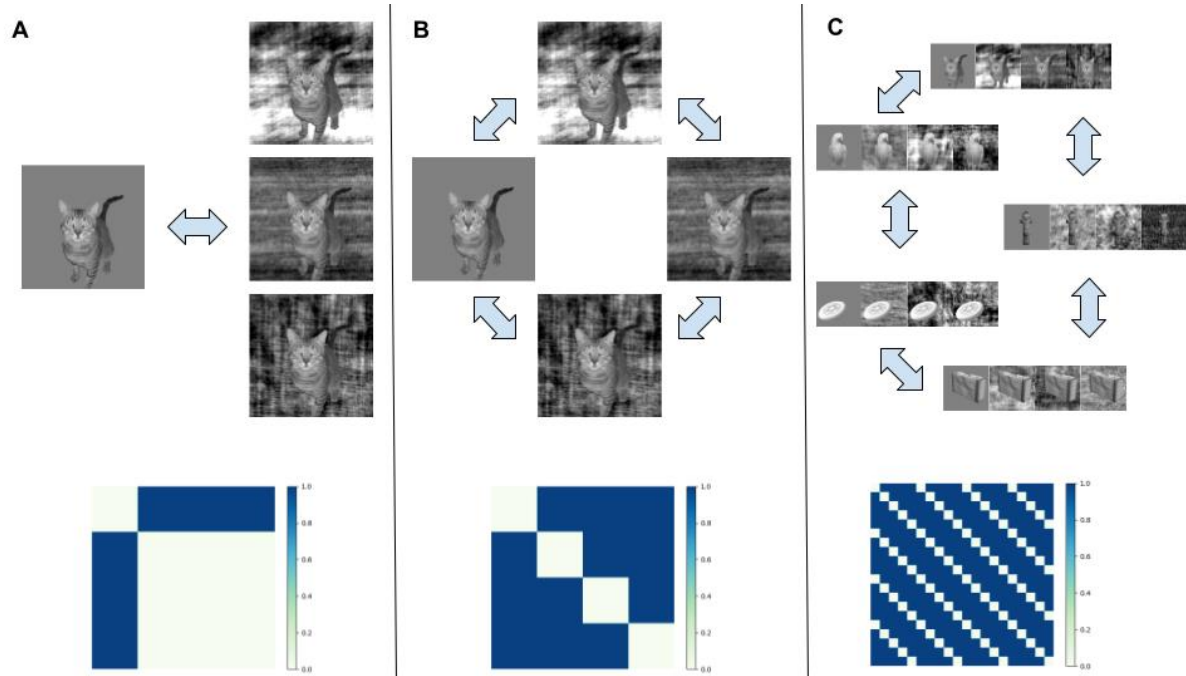

488

489 **Figure 7. Categorical models of main experimental manipulations.** A) The categorical RDM of  
490 segmentation distinguishes between trials with and without backgrounds. B) The categorical RDM of  
491 background complexity distinguishes between trials with different background complexities. C) The  
492 categorical RDM of object category distinguishes between trials based on the target object category.

493

494 First, we performed partial correlations between the categorical RDMs and EEG RDMs, and  
495 between the categorical RDMs and DCNN RDMs to identify the shared representational  
496 structure. We chose to use a partial correlation instead of a regression to control for the  
497 correlation between the segmentation and background complexity categorical model.

498 Second, we qualitatively inspected the representations from both EEG and DCNNs using t-  
499 distributed stochastic neighbor embedding (tSNE) (32). Third, we performed a Spearman

500 correlation (i.e. classical representational similarity analysis) between EEG RDMs (for every  
501 time sample) and DCNN RDMs (per layer). Fourth, we normalized each layer's explained  
502 variance from the Spearman correlation against the upper noise ceiling (the upper bound of  
503 EEG data) for all time samples and then plotted its median correlation against the layer's

## HUMAN VISUAL CORTEX AND DEEP CONVOLUTIONAL NEURAL NETWORKS CARE DEEPLY ABOUT OBJECT BACKGROUND

504 correlation with the categorical RDMs. This allowed us to summarize each layer's correlation  
505 with EEG data across all time samples.

506 All statistical analysis was performed and visualized in Python using the following packages:  
507 NumPy, SciPy, Statsmodels, Pandas, Seaborn, Matplotlib (53–58).

508

### 509 **Analysis: Statistical**

510 We used a Wilcoxon signed rank test to determine the onset of correlation significance  
511 between categorical RDMs and EEG RDMs, and to determine statistical significant  
512 differences in the correlation values of categorical RDMs. The  $p$ -values obtained from the  
513 Wilcoxon signed rank test are Bonferroni corrected for multiple comparisons ( $\alpha=0.01$ ).

## 514 Acknowledgements

515 This work is supported by an Interdisciplinary Doctorate Agreement from the  
516 University of Amsterdam to H. Steven Scholte and Natalie Cappaert and an Advanced  
517 Investigator Grant from the European Research Council (ERC) to Edward de Haan  
518 (#339374).

## 519 References

- 520 1. Yamins DLK, Hong H, Cadieu CF, Solomon EA, Seibert D, DiCarlo JJ. Performance-optimized  
521 hierarchical models predict neural responses in higher visual cortex. *Proc Natl Acad Sci U S A*  
522 [Internet]. 2014 Jun 10;111(23):8619–24. Available from:  
523 <http://dx.doi.org/10.1073/pnas.1403112111>
- 524 2. Cadieu CF, Hong H, Yamins DLK, Pinto N, Ardila D, Solomon EA, et al. Deep neural networks  
525 rival the representation of primate IT cortex for core visual object recognition. *PLoS Comput Biol*  
526 [Internet]. 2014 Dec;10(12):e1003963. Available from:  
527 <http://dx.doi.org/10.1371/journal.pcbi.1003963>
- 528 3. Khaligh-Razavi SM, Kriegeskorte N. Deep supervised, but not unsupervised, models may

## HUMAN VISUAL CORTEX AND DEEP CONVOLUTIONAL NEURAL NETWORKS CARE DEEPLY ABOUT OBJECT BACKGROUND

- 529 explain IT cortical representation. PLoS Comput Biol [Internet]. 2014 Nov;10(11):e1003915.  
530 Available from: <http://dx.doi.org/10.1371/journal.pcbi.1003915>
- 531 4. Schrimpf M, Kubilius J, Hong H, Majaj NJ, Rajalingham R, Issa EB, et al. Brain-Score: Which  
532 Artificial Neural Network for Object Recognition is most Brain-Like? [Internet]. 2018 [cited 2020  
533 Sep 17]. p. 407007. Available from: <https://www.biorxiv.org/content/10.1101/407007v1.abstract>
- 534 5. Eickenberg M, Gramfort A, Varoquaux G, Thirion B. Seeing it all: Convolutional network layers  
535 map the function of the human visual system. Neuroimage [Internet]. 2017 May 15;152:184–94.  
536 Available from: <http://dx.doi.org/10.1016/j.neuroimage.2016.10.001>
- 537 6. Ritchie JB, Zeman AA, Bosmans J, Sun S, Verhaegen K, Op de Beeck HP. Untangling the  
538 Animacy Organization of Occipitotemporal Cortex. J Neurosci [Internet]. 2021 Aug  
539 18;41(33):7103–19. Available from: <http://dx.doi.org/10.1523/JNEUROSCI.2628-20.2021>
- 540 7. Dwivedi K, Bonner MF, Cichy RM, Roig G. Unveiling functions of the visual cortex using task-  
541 specific deep neural networks. PLoS Comput Biol [Internet]. 2021 Aug;17(8):e1009267. Available  
542 from: <http://dx.doi.org/10.1371/journal.pcbi.1009267>
- 543 8. Doerig A, Kietzmann TC, Allen E, Wu Y. Semantic scene descriptions as an objective of human  
544 vision. arXiv preprint arXiv [Internet]. 2022; Available from: <https://arxiv.org/abs/2209.11737>
- 545 9. Takagi Y, Nishimoto S. High-resolution image reconstruction with latent diffusion models from  
546 human brain activity [Internet]. bioRxiv. 2022 [cited 2023 Mar 14]. p. 2022.11.18.517004.  
547 Available from: <https://www.biorxiv.org/content/10.1101/2022.11.18.517004v2.full>
- 548 10. Yamins DLK, DiCarlo JJ. Using goal-driven deep learning models to understand sensory cortex.  
549 Nat Neurosci [Internet]. 2016 Mar;19(3):356–65. Available from:  
550 <http://dx.doi.org/10.1038/nn.4244>
- 551 11. Cichy RM, Kaiser D. Deep Neural Networks as Scientific Models. Trends Cogn Sci [Internet].  
552 2019 Apr 1 [cited 2022 Jul 28];23(4):305–17. Available from:  
553 [https://www.cell.com/trends/cognitive-sciences/fulltext/S1364-6613\(19\)30034-8](https://www.cell.com/trends/cognitive-sciences/fulltext/S1364-6613(19)30034-8)
- 554 12. Kay KN. Principles for models of neural information processing. Neuroimage [Internet]. 2018 Oct  
555 15;180(Pt A):101–9. Available from: <http://dx.doi.org/10.1016/j.neuroimage.2017.08.016>
- 556 13. Marcus G. Deep Learning: A Critical Appraisal [Internet]. arXiv [cs.AI]. 2018. Available from:  
557 <http://arxiv.org/abs/1801.00631>
- 558 14. Scholte HS. Fantastic DNimals and where to find them. Neuroimage [Internet]. 2018 Oct  
559 15;180(Pt A):112–3. Available from: <http://dx.doi.org/10.1016/j.neuroimage.2017.12.077>
- 560 15. Lillicrap TP, Kording KP. What does it mean to understand a neural network? [Internet]. arXiv  
561 [cs.LG]. 2019. Available from: <http://arxiv.org/abs/1907.06374>
- 562 16. Rajalingham R, Issa EB, Bashivan P, Kar K, Schmidt K, DiCarlo JJ. Large-Scale, High-Resolution  
563 Comparison of the Core Visual Object Recognition Behavior of Humans, Monkeys, and State-of-  
564 the-Art Deep Artificial Neural Networks. J Neurosci [Internet]. 2018 Aug 15 [cited 2022 Jul  
565 28];38(33):7255–69. Available from: <https://www.jneurosci.org/content/38/33/7255>
- 566 17. Geirhos R, Janssen DHJ, Schütt HH, Rauber J. Comparing deep neural networks against  
567 humans: object recognition when the signal gets weaker. arXiv preprint arXiv [Internet]. 2017;  
568 Available from: <https://arxiv.org/abs/1706.06969>
- 569 18. Geirhos R, Meding K. Beyond accuracy: quantifying trial-by-trial behaviour of CNNs and humans  
570 by measuring error consistency. Adv Neural Inf Process Syst [Internet]. 2020; Available from:

## HUMAN VISUAL CORTEX AND DEEP CONVOLUTIONAL NEURAL NETWORKS CARE DEEPLY ABOUT OBJECT BACKGROUND

- 571 <https://proceedings.neurips.cc/paper/2020/hash/9f6992966d4c363ea0162a056cb45fe5->  
572 [Abstract.html](https://proceedings.neurips.cc/paper/2020/hash/9f6992966d4c363ea0162a056cb45fe5-)
- 573 19. Geirhos R, Rubisch P, Michaelis C, Bethge M. ImageNet-trained CNNs are biased towards  
574 texture; increasing shape bias improves accuracy and robustness. arXiv preprint arXiv [Internet].  
575 2018; Available from: <https://arxiv.org/abs/1811.12231>
- 576 20. Baker N, Lu H, Erlikhman G, Kellman PJ. Deep convolutional networks do not classify based on  
577 global object shape. PLoS Comput Biol [Internet]. 2018 Dec;14(12):e1006613. Available from:  
578 <http://dx.doi.org/10.1371/journal.pcbi.1006613>
- 579 21. Ritter S, Barrett D, Santoro A, Botvinick M. Cognitive Psychology for Deep Neural Networks: A  
580 Shape Bias Case Study. International Conference on Machine Learning [Internet]. 2017 [cited  
581 2023 Jan 4]; Available from:  
582 <https://www.semanticscholar.org/paper/39fb9fa2615620f043084a2ecbbdb1a1f8c707c9>
- 583 22. Tartaglini AR, Vong WK, Lake B. A Developmentally-Inspired Examination of Shape versus  
584 Texture Bias in Machines. ArXiv [Internet]. 2022 [cited 2023 Jan 4]; Available from:  
585 <https://www.semanticscholar.org/paper/65f1fc374fe521a77b0dc9853280d1e5d64a87ef>
- 586 23. Goodfellow IJ, Shlens J, Szegedy C. Explaining and Harnessing Adversarial Examples. ICLR  
587 [Internet]. 2014 [cited 2022 Jul 28]; Available from:  
588 <https://www.semanticscholar.org/paper/bee044c8e8903fb67523c1f8c105ab4718600cdb>
- 589 24. Akhtar N, Mian A. Threat of Adversarial Attacks on Deep Learning in Computer Vision: A Survey.  
590 IEEE Access [Internet]. 2018;6:14410–30. Available from:  
591 <http://dx.doi.org/10.1109/ACCESS.2018.2807385>
- 592 25. Cao R, Yamins D. Explanatory models in neuroscience: Part 1--taking mechanistic abstraction  
593 seriously. arXiv preprint arXiv:2104.01490 [Internet]. 2021; Available from:  
594 <http://arxiv.org/abs/2104.01490>
- 595 26. Truzzi A, Cusack R. Understanding cnns as a model of the inferior temporal cortex: using  
596 mediation analysis to unpack the contribution of perceptual and semantic features in random  
597 and .... NeurIPS 2020 Workshop SVRHM [Internet]. 2020; Available from:  
598 <https://openreview.net/forum?id=r7R7VAN6t-k>
- 599 27. Roelfsema PR. Cortical algorithms for perceptual grouping. Annu Rev Neurosci [Internet].  
600 2006;29:203–27. Available from: <http://dx.doi.org/10.1146/annurev.neuro.29.051605.112939>
- 601 28. Roelfsema PR, Lamme VAF, Spekreijse H. Figure—ground segregation in a recurrent network  
602 architecture. Journal of cognitive [Internet]. 2002; Available from:  
603 <https://www.mitpressjournals.org/doi/abs/10.1162/08989290260045756>
- 604 29. Loke J, Seijdel N, Snoek L, van der Meer M, van de Klundert R, Quispel E, et al. A Critical Test of  
605 Deep Convolutional Neural Networks' Ability to Capture Recurrent Processing in the Brain Using  
606 Visual Masking. J Cogn Neurosci [Internet]. 2022 Nov 1;34(12):2390–405. Available from:  
607 [http://dx.doi.org/10.1162/jocn\\_a\\_01914](http://dx.doi.org/10.1162/jocn_a_01914)
- 608 30. Seijdel N, Tsakmakidis N, de Haan EHF, Bohte SM, Scholte HS. Depth in convolutional neural  
609 networks solves scene segmentation. PLoS Comput Biol [Internet]. 2020 Jul;16(7):e1008022.  
610 Available from: <http://dx.doi.org/10.1371/journal.pcbi.1008022>
- 611 31. Borji A. Contemplating real-world object classification [Internet]. arXiv [cs.CV]. 2021. Available  
612 from: <http://arxiv.org/abs/2103.05137>
- 613 32. Maaten L van der, Hinton G. Visualizing Data using t-SNE. J Mach Learn Res [Internet]. 2008

## HUMAN VISUAL CORTEX AND DEEP CONVOLUTIONAL NEURAL NETWORKS CARE DEEPLY ABOUT OBJECT BACKGROUND

- 614 [cited 2020 Sep 29];9(Nov):2579–605. Available from:  
615 <http://www.jmlr.org/papers/v9/vandermaaten08a.html>
- 616 33. Kriegeskorte N, Mur M, Bandettini P. Representational similarity analysis - connecting the  
617 branches of systems neuroscience. *Front Syst Neurosci* [Internet]. 2008 Nov 24;2:4. Available  
618 from: <http://dx.doi.org/10.3389/neuro.06.004.2008>
- 619 34. Groen IIA, Jahfari S, Seijdel N, Ghebreab S, Lamme VAF, Scholte HS. Scene complexity  
620 modulates degree of feedback activity during object detection in natural scenes. *PLoS Comput*  
621 *Biol* [Internet]. 2018 Dec;14(12):e1006690. Available from:  
622 <http://dx.doi.org/10.1371/journal.pcbi.1006690>
- 623 35. Seijdel N, Loke J, van de Klundert R, van der Meer M, Quispel E, van Gaal S, et al. On the  
624 necessity of recurrent processing during object recognition: it depends on the need for scene  
625 segmentation. *J Neurosci* [Internet]. 2021 Jun 2; Available from:  
626 <http://dx.doi.org/10.1523/JNEUROSCI.2851-20.2021>
- 627 36. Thorpe S, Fize D, Marlot C. Speed of processing in the human visual system. *Nature* [Internet].  
628 1996 Jun 6;381(6582):520–2. Available from: <http://dx.doi.org/10.1038/381520a0>
- 629 37. Hung CP, Kreiman G, Poggio T, DiCarlo JJ. Fast readout of object identity from macaque  
630 inferior temporal cortex. *Science* [Internet]. 2005 Nov 4;310(5749):863–6. Available from:  
631 <http://dx.doi.org/10.1126/science.1117593>
- 632 38. Kar K, Kubilius J, Schmidt K, Issa EB, DiCarlo JJ. Evidence that recurrent circuits are critical to  
633 the ventral stream’s execution of core object recognition behavior. *Nat Neurosci* [Internet]. 2019;  
634 Available from: <https://www.nature.com/articles/s41593-019-0392-5>
- 635 39. Lamme VA, Supèr H, Spekreijse H. Feedforward, horizontal, and feedback processing in the  
636 visual cortex. *Curr Opin Neurobiol* [Internet]. 1998 Aug;8(4):529–35. Available from:  
637 [http://dx.doi.org/10.1016/s0959-4388\(98\)80042-1](http://dx.doi.org/10.1016/s0959-4388(98)80042-1)
- 638 40. Scholte HS, Jolij J, Fahrenfort JJ, Lamme VAF. Feedforward and recurrent processing in scene  
639 segmentation: electroencephalography and functional magnetic resonance imaging. *J Cogn*  
640 *Neurosci* [Internet]. 2008 Nov;20(11):2097–109. Available from:  
641 <http://dx.doi.org/10.1162/jocn.2008.20142>
- 642 41. Self MW, Jeurissen D, van Ham AF, van Vugt B, Poort J, Roelfsema PR. The Segmentation of  
643 Proto-Objects in the Monkey Primary Visual Cortex. *Curr Biol* [Internet]. 2019 Mar 18;29(6):1019–  
644 29.e4. Available from: <http://dx.doi.org/10.1016/j.cub.2019.02.016>
- 645 42. Kirchberger L, Mukherjee S, Schnabel UH, van Beest EH, Barsegyan A, Levelt CN, et al. The  
646 essential role of recurrent processing for figure-ground perception in mice. *Sci Adv* [Internet].  
647 2021 Jun;7(27). Available from: <http://dx.doi.org/10.1126/sciadv.abe1833>
- 648 43. Fahrenfort JJ, Scholte HS, Lamme VAF. Masking disrupts reentrant processing in human visual  
649 cortex. *J Cogn Neurosci* [Internet]. 2007 Sep;19(9):1488–97. Available from:  
650 <http://dx.doi.org/10.1162/jocn.2007.19.9.1488>
- 651 44. Cao R, Yamins D. Explanatory models in neuroscience: Part 2--constraint-based intelligibility.  
652 arXiv preprint arXiv:210401489 [Internet]. 2021; Available from: <http://arxiv.org/abs/2104.01489>
- 653 45. Storrs KR, Kietzmann TC, Walther A, Mehrer J, Kriegeskorte N. Diverse Deep Neural Networks  
654 All Predict Human Inferior Temporal Cortex Well, After Training and Fitting. *J Cogn Neurosci*  
655 [Internet]. 2021 Sep 1;33(10):2044–64. Available from: [http://dx.doi.org/10.1162/jocn\\_a\\_01755](http://dx.doi.org/10.1162/jocn_a_01755)
- 656 46. Cichy RM, Khosla A, Pantazis D, Torralba A, Oliva A. Comparison of deep neural networks to



## HUMAN VISUAL CORTEX AND DEEP CONVOLUTIONAL NEURAL NETWORKS CARE DEEPLY ABOUT OBJECT BACKGROUND

- 657 spatio-temporal cortical dynamics of human visual object recognition reveals hierarchical  
658 correspondence. *Sci Rep* [Internet]. 2016 Jun 10;6:27755. Available from:  
659 <http://dx.doi.org/10.1038/srep27755>
- 660 47. Krizhevsky A, Sutskever I, Hinton GE. ImageNet Classification with Deep Convolutional Neural  
661 Networks. In: Pereira F, Burges CJ, Bottou L, Weinberger KQ, editors. *Advances in Neural  
662 Information Processing Systems* [Internet]. Curran Associates, Inc.; 2012. Available from:  
663 [https://proceedings.neurips.cc/paper/2012/file/c399862d3b9d6b76c8436e924a68c45b-  
664 Paper.pdf](https://proceedings.neurips.cc/paper/2012/file/c399862d3b9d6b76c8436e924a68c45b-Paper.pdf)
- 665 48. Simonyan K, Zisserman A. Very Deep Convolutional Networks for Large-Scale Image  
666 Recognition. *arXiv e-prints* [Internet]. 2014 Sep 1;arXiv:1409.1556. Available from:  
667 <https://ui.adsabs.harvard.edu/abs/2014arXiv1409.1556S>
- 668 49. He K, Zhang X, Ren S, Sun J. Deep residual learning for image recognition. *Proc IEEE* [Internet].  
669 2016; Available from:  
670 [http://openaccess.thecvf.com/content\\_cvpr\\_2016/html/He\\_Deep\\_Residual\\_Learning\\_CVPR\\_201  
671 6\\_paper.html](http://openaccess.thecvf.com/content_cvpr_2016/html/He_Deep_Residual_Learning_CVPR_2016_paper.html)
- 672 50. Lin TY, Maire M, Belongie S, Hays J, Perona P, Ramanan D, et al. Microsoft COCO: Common  
673 Objects in Context. In: *Computer Vision – ECCV 2014* [Internet]. Springer International  
674 Publishing; 2014. p. 740–55. Available from: [http://dx.doi.org/10.1007/978-3-319-10602-1\\_48](http://dx.doi.org/10.1007/978-3-319-10602-1_48)
- 675 51. Mehrer J, Spoerer CJ, Kriegeskorte N, Kietzmann TC. Individual differences among deep neural  
676 network models. *Nat Commun* [Internet]. 2020 Nov 12;11(1):5725. Available from:  
677 <http://dx.doi.org/10.1038/s41467-020-19632-w>
- 678 52. Paszke A, Gross S, Massa F, Lerer A, Bradbury J, Chanan G, et al. PyTorch: An Imperative  
679 Style, High-Performance Deep Learning Library. In: Wallach H, Larochelle H, Beygelzimer A,  
680 d\textquotesingle Alché-Buc F, Fox E, Garnett R, editors. *Advances in Neural Information  
681 Processing Systems* [Internet]. Curran Associates, Inc.; 2019. Available from:  
682 <https://proceedings.neurips.cc/paper/2019/file/bdbca288fee7f92f2bfa9f7012727740-Paper.pdf>
- 683 53. Harris CR, Millman KJ, van der Walt SJ, Gommers R, Virtanen P, Cournapeau D, et al. Array  
684 programming with NumPy. *Nature* [Internet]. 2020 Sep;585(7825):357–62. Available from:  
685 <http://dx.doi.org/10.1038/s41586-020-2649-2>
- 686 54. Virtanen P, Gommers R, Oliphant TE, Haberland M, Reddy T, Cournapeau D, et al. SciPy 1.0:  
687 fundamental algorithms for scientific computing in Python. *Nat Methods* [Internet]. 2020  
688 Mar;17(3):261–72. Available from: <http://dx.doi.org/10.1038/s41592-019-0686-2>
- 689 55. Seabold S, Perktold J. Statsmodels: Econometric and statistical modeling with python. In:  
690 *Proceedings of the 9th Python in Science Conference* [Internet]. Austin, TX; 2010. p. 61.  
691 Available from:  
692 <https://pdfs.semanticscholar.org/3a27/6417e5350e29cb6bf04ea5a4785601d5a215.pdf>
- 693 56. McKinney W, Others. Data structures for statistical computing in python. In: *Proceedings of the  
694 9th Python in Science Conference* [Internet]. Austin, TX; 2010. p. 51–6. Available from:  
695 <http://conference.scipy.org/proceedings/scipy2010/pdfs/mckinney.pdf>
- 696 57. Waskom M. seaborn: statistical data visualization. *J Open Source Softw* [Internet]. 2021 Apr  
697 6;6(60):3021. Available from: <https://joss.theoj.org/papers/10.21105/joss.03021>
- 698 58. Hunter JD. Matplotlib: A 2D Graphics Environment. *Comput Sci Eng* [Internet]. 2007  
699 May;9(3):90–5. Available from: <http://dx.doi.org/10.1109/MCSE.2007.55>
